# Supplementary material
Source: HighWire-hosted journal article supplement (https://n.neurology.org/content/suppl/2016/04/10/WNL.0000000000001729)
Supplement: wingerchuk_177.pdf [file wingerchuk_177.pdf]

# 시신경척수염 스펙트럼 장애에 대한 국제적 합의 진단 기준

## International consensus diagnostic criteria for neuromyelitis optica spectrum disorders

Dean M. Wingerchuk, MD, FRCP(C)  
 Brenda Banwell, MD, FRCP(C)  
 Jeffrey L. Bennett, MD, PhD  
 Philippe Cabre, MD  
 William Carroll, MD  
 Tanuja Chitnis, MD  
 Jérôme de Seze, MD  
 Kazuo Fujihara, MD  
 Benjamin Greenberg, MD  
 Anu Jacob, MD  
 Sven Jarius, MD  
 Marco Lana-Peixoto, MD  
 Michael Levy, MD, PhD  
 Jack H. Simon, MD  
 Silvia Tenenbaum, MD  
 Anthony L. Traboulsee, MD, FRCP(C)  
 Patrick Waters, PhD  
 Kay E. Wellik, MLS  
 Brian G. Weinschenker, MD, FRCP(C)

시신경척수염(neuromyelitis optica, NMO)은 혈청 아쿠아포린-4 면역글로불린 G 항체(serum aquaporin-4 immunoglobulin G antibodies, AQP4-IgG)와 관련된, 다발성 경화증(multiple sclerosis, MS)과는 다른 염증성 중추 신경계 증후군이다. 이전의 NMO 진단 기준에는 시신경과 척수의 병변이 필수적이었으나, 좀 더 국소적이거나 좀 더 광범위한 중추 신경계 병변이 생길 수 있다. NMO 진단을 위한 국제 패널(International Panel for NMO Diagnosis, IPND)은 진단 기준을 개정하기 위해 소집되어, 체계적 문헌 검토와 전자 설문 조사를 진행하였다. 통합된 새로운 명칭은 NMO 스펙트럼 장애(NMO spectrum disorders, NMOSD)이고, 이는 혈청학적 검사에 따라 AQP4-IgG 양성 또는 음성 NMOSD로 세분되었다. AQP4-IgG 양성 NMOSD 환자의 임상적 특징으로는 시신경, 척수, 맨아래구역(area postrema), 뇌간, 간뇌 혹은 다른 대뇌 등의 병변과 관련된 MRI 소견이나 임상 증상이 있어야 한다. AQP4-IgG가 음성이거나 또는 혈청 검사가 불가능하면, 더 엄격한 임상 기준과 추가적인 신경영상검사 결과가 필요하다. 또한, IPND는 소아 NMOSD 진단과 단상 NMOSD 및 시신경척수형 MS의 진단 기준 개념에 대한 검증 방법을 제안하고 합의를 이루었다.

Neurology® 2015;85:177-189

시신경척수염(neuromyelitis optica, NMO)은 다발성 경화증(multiple sclerosis, MS)과 구별되는 또 다른 염증성 중추 신경계 질병이다.<sup>1,2</sup> 이 질병은 1894년에 처음 Devic disease로 세상에 알려지게 되었다.<sup>3,e1,e2</sup> 과거에, NMO는 양측 시신경염과 횡단 척수염이 동시에 단상(mono-phasic)으로 발생하는 질병으로 생각되었으나, 20세기 들어 재발하는 증례들이 보고되었다.<sup>3</sup> MRI 검사상 뇌에서는 정상 소견을 보이는 반면, 척수에서는 길이 방향으로 세 척추 분절 이상의 광범위한 횡단 척수염 병변(longitudinally extensive transverse myelitis, LETM)을 보인다.<sup>4,e3</sup> 질병 분류학적으로 NMO가 공간적으로 제한된 MS의 한 종류인지에 대해서는 아직 논란이 남아 있다.

수분 통로인 아쿠아포린-4에 대한 혈청항체(AQP4-immunoglobulin G [IgG], AQP4-IgG)가<sup>5,6</sup> 임상적으로 진단된 NMO 환자에게 매우 특이적이며, 또한 이 항체가 잠재적으로 NMO 병리 기전에 관여하는 것이 발견되면서, NMO에 대해 큰 진전이 있었다.<sup>7,e4-e6</sup> 2006년 NMO 진단 기준을 개정하면서, 임상적인 기준을 완화하여 편측성 시신경염과 무증상성 뇌 MRI 병변이 진단 기준에 포함되었으나, 시신경염과 척수염이 함께 있어야 진단이 가능하도록 하는 것은 유지되었으며, AQP4-IgG의 혈청검사 소견이 새로 포함되었다.<sup>2</sup> 이러한 2006년 개정된 진단 기준은 세계의 서로 다른 인종을 대상으로 한 여러 연구들에서 검증되었고, 현재는 임상과 연구 분야 모두에서 표준적인 기준이 되었다.<sup>8-10,e5,e7-e15</sup>

AQP4-IgG의 높은 특이도는 NMO의 임상 및 영상의학적 스펙트럼을 넓혔다. 2007년 처음으로 NMO spectrum disorder (NMOSD)란 용어가 사용되었는데, 이는 AQP4-IgG가 양성인 NMO의 기준을 모두 만족시키지 못하거나, 최초 발생하고 향후 재발 가능성이 높은(예. 처음 발생한 LETM 혹은 양측성 시신경염) 경우들을 포함하였다.<sup>1</sup> NMOSD는 전형적인 NMO에서 드문 대뇌, 간뇌, 뇌간의 병변을 보이는 경우도 포함하였으며, 다른 면역질환(예. 전신홍반루푸스[Systemic lupus erythematosus, SLE], 쇼그렌 증후군[Sjögren syndrome, SS])을 동반한 AQP4-IgG 양성 환자들도 포함하였다. 뿐만 아니라, NMOSD는 아시아에서 비교적 흔한 아형인 시신경척수 MS로 진단된 환자들도 잠재적으로 포함하였다.<sup>11</sup>

진단이 발전함에 따라 2006년에 재정의된 진단 기준은 최신 임상과 연구에서 사용하기 부적절하게 되었다. AQP4-IgG의 민감도가 발전함에 따라 시신경척수 이외 부위를 침범하는 질병의 특징이 재정의되었고,<sup>8-10,e5,e7-e15</sup> NMO 환자의 뇌와 척수의 병변에서 AQP4의 면역 반응 소실과 별세포 병리소견은 MS와 구분하는 주요 병리학적 소견이 되었다.<sup>e19-e23</sup> 종합해 보면, 이러한 자료들은, 비-시신경척수 질병의 임상적인 특성과 MRI의 특징적인 소견이 NMO의 진단 기준에 포함되어야 함을 의미한다. 그 동안 NMOSD라는 용어는 문헌들에서 여러 의미로 사용되어 정립이 필요하다.<sup>3</sup> 다른 주요 이슈들로는, 소아 NMO가 다른 형태를 보이는지, 시신경척수 MS라는 용어의 필요성이 있는지, 단상 NMO가 정의 될 수 있는지가 있다. 결론적으로, NMO와 MS, 두 질병의 재발을 예방하는 치료 전략은 다르다. MS

에 이용되는 일부 면역 치료제들은 NMO를 악화시킬 수 있으므로 조기에 정확한 진단을 하는 것이 중요하다.<sup>15-18, e24-e26</sup> NMO 진단을 위한 국제 패널(International Panel for NMO Diagnosis, IPND)은 앞서 제기한 이슈들을 해결하고, 임상적 의사 결정에 도움을 줄 수 있는 NMO 진단 기준을 개정하기 위해 소집되었다. 본 보고서는 패널의 합의 권고 사항을 바탕으로 작성되었다..

## 방 법

IPND는 9개 국가의 18명의 회원으로 구성되어 2명의 공동의장(D.M.W., B.G.W.)에 의해 주도되었다. 2011년 10월과 2013년 11월 사이에 7번 개최되었으며, 패널 회원들은 다음과 같은 여섯 개의 워킹 그룹에 참여하였는데 임상 양상, 신경영상검사, 혈청학적 검사, 소아, 전신 자가면역, 시신경척수 MS이다.

최초 합의는 두 개의 결론에 도달하였다. 먼저, NMO는 하나의 기술적인 용어인 NMOSD으로 통합하여 기술한다. 이는 NMOSD 환자의 임상 양상, 면역병리, 치료가 NMO 환자나 추후 NMO의 진단 기준을 만족시킬 가능성이 높으나, 아직은 기준에 모두 맞지 않는 NMO 환자와 다르지 않기 때문이다.<sup>1,14,19,20, e27</sup> 비록, NMOSD의 기준이 넓어져 시신경염이나 척수염이 없는 환자들을 포함하게 될 가능성이 높으나,<sup>21</sup> 이러한 환

자들도 대부분의 NMOSD 환자에서 발생하기 때문에, NMOSD를 사용함으로써 깊게 뿌리 박힌, 역사적으로 의미 있는 어구인 NMO는 계속 남게 될 것이다. 둘째로, 개정된 기준은 임상적, 혈청학적, 영상적 자료를 통합적으로 이용하여 임상적으로 진단할 수 있도록 하였다. 개정된 진단은 AQP4-IgG의 양성 여부에 의해서만 전적으로 결정되지 않도록 하였다. 뿐만 아니라, AQP4-IgG 검사가 음성이거나 검사가 불가능한 경우에도 치료 결정이 필요하므로 패널들은 이러한 경우에도 NMOSD의 진단 기준을 정의하도록 하였다.

IPND는 사용 가능한 최선의 근거들을 이용하여 NMOSD 진단 기준 개정에 대한 합의점을 찾는 것을 골자로 하는 몇 가지 목표를 정립하였다. 임상 양상 워킹 그룹은 임상적으로 혹은 AQP4-IgG 양성 소견으로 NMO로 진단된 환자들의 임상 증후군들의 스펙트럼을 정립하고, 검증하는 일차 작업을 수행하였다. 이러한 자료들은 새로운 임상적 진단 기준을 마련하는데 사용되었다. 다른 워킹 그룹들도 각각 최종 기준 마련에 기여하였다.

각각의 워킹 그룹들은 전문적인 사서와 함께 각자의 과제를 해결하기 위해 체계적인 문헌 고찰을 시행하였다. Medical subject heading 용어를 가능하면 모두 사용하였으며, 1946년 1월부터 2012년까지 MEDLINE, EMBASE 등에서 각 사분기별로 검색 및 갱신하여 2014년 1월 15일까지 마지막으로 갱신하였다(검색 조건을 위해서는 table e-1 Neurology® Web site, Neurology.org 참고). 두 명의 독립적인 연구자들이 관련 있는 초록들을 검토하고, 서로 일치하지 않는 경우, 합의를 통해 해결하였다. 관련 있는 논문들은 논문 전체를 독립적으로 평가하여 자료 추출 여부가 결정되었다. AQP4-IgG의 민감도 및 특이도에 관한 연구도 NMO와 MS 환자들을 비교하는 경우에는 포함시켰다.

임상 양상 및 신경영상 워킹 그룹은 NMOSD나 AQP4-IgG와 연관된 논문에서 한 번이라도 보고된 임상 증후군과 MRI 검사의 특징들을 모두 수집하여 목록을 만들었다. 패널의 위원들은 2개의 전자 설문조사를 이용하여 NMOSD 진단 특징들의 특이도를 평가하였다. 추가적인 2개의 조사는 임상 증상과 징후(1-3개의 서로 다른 임상 사건), 뇌 MRI, AQP4-IgG의 혈청학적 상태, 잠재적으로 진단 기준에 부합하는 정보(시신경이나 척수의 MRI 소견), 검사 결과(예. 뇌척수액 검사, 시신경 유발 전위)를 포함하는 성인 환자의 증례를 포함하여 진행되었다. 패널 위원들은 각 증례에 대해 진단을 붙였다: 명확한 NMOSD, 불명확(확실한 진단을 위해 더 많은 자료나, 추적검사가 필요한 경우), 기타(예. MS). 잠재적으로 NMOSD 진단 기준에 포함 가능한 임상 양상, MRI 결과, 실험실 결과들은 각각 그 가능성

**Table 1 NMOSD diagnostic criteria for adult patients**

|                                                                                                                                                                                                                                                                                                                                                                                                                                                                                                                                                                                                                                                                                                                                                                                                                                                                                                                |
|----------------------------------------------------------------------------------------------------------------------------------------------------------------------------------------------------------------------------------------------------------------------------------------------------------------------------------------------------------------------------------------------------------------------------------------------------------------------------------------------------------------------------------------------------------------------------------------------------------------------------------------------------------------------------------------------------------------------------------------------------------------------------------------------------------------------------------------------------------------------------------------------------------------|
| <p><b>Diagnostic criteria for NMOSD with AQP4-IgG</b></p> <ol style="list-style-type: none"> <li>At least 1 core clinical characteristic</li> <li>Positive test for AQP4-IgG using best available detection method (cell-based assay strongly recommended)</li> <li>Exclusion of alternative diagnoses<sup>a</sup></li> </ol>                                                                                                                                                                                                                                                                                                                                                                                                                                                                                                                                                                                  |
| <p><b>Diagnostic criteria for NMOSD without AQP4-IgG or NMOSD with unknown AQP4-IgG status</b></p> <ol style="list-style-type: none"> <li>At least 2 core clinical characteristics occurring as a result of one or more clinical attacks and meeting all of the following requirements:               <ol style="list-style-type: none"> <li>At least 1 core clinical characteristic must be optic neuritis, acute myelitis with LETM, or area postrema syndrome</li> <li>Dissemination in space (2 or more different core clinical characteristics)</li> <li>Fulfillment of additional MRI requirements, as applicable</li> </ol> </li> <li>Negative tests for AQP4-IgG using best available detection method, or testing unavailable</li> <li>Exclusion of alternative diagnoses<sup>a</sup></li> </ol>                                                                                                      |
| <p><b>Core clinical characteristics</b></p> <ol style="list-style-type: none"> <li>Optic neuritis</li> <li>Acute myelitis</li> <li>Area postrema syndrome: episode of otherwise unexplained hiccups or nausea and vomiting</li> <li>Acute brainstem syndrome</li> <li>Symptomatic narcolepsy or acute diencephalic clinical syndrome with NMOSD-typical diencephalic MRI lesions (figure 3)</li> <li>Symptomatic cerebral syndrome with NMOSD-typical brain lesions (figure 3)</li> </ol>                                                                                                                                                                                                                                                                                                                                                                                                                      |
| <p><b>Additional MRI requirements for NMOSD without AQP4-IgG and NMOSD with unknown AQP4-IgG status</b></p> <ol style="list-style-type: none"> <li>Acute optic neuritis: requires brain MRI showing (a) normal findings or only nonspecific white matter lesions, OR (b) optic nerve MRI with T2-hyperintense lesion or T1-weighted gadolinium-enhancing lesion extending over &gt;1/2 optic nerve length or involving optic chiasm (figure 1)</li> <li>Acute myelitis: requires associated intramedullary MRI lesion extending over ≥3 contiguous segments (LETM) OR ≥3 contiguous segments of focal spinal cord atrophy in patients with history compatible with acute myelitis (figure 1)</li> <li>Area postrema syndrome: requires associated dorsal medulla/area postrema lesions (figure 2)</li> <li>Acute brainstem syndrome: requires associated periependymal brainstem lesions (figure 2)</li> </ol> |

Abbreviations: AQP4 = aquaporin-4; IgG = immunoglobulin G; LETM = longitudinally extensive transverse myelitis lesions; NMOSD = neuromyelitis optica spectrum disorders.

<sup>a</sup> See table 2 and text discussion on serologic considerations for recommendations regarding interpretation of clinical and serologic testing.

의 정도가 평가되었다. 전체 위원의 2/3 이상이 찬성한 NMOSD 특징은 AQP4-IgG 혈청검사 양성 및 음성인 NMOSD의 임상적 진단을 위한 기준을 마련하는데 사용되었다. 소아 NMOSD, 시신경척수 MS, 전신적 자가면역 질환, 단상의 질환에 대한 각 워킹 그룹의 제안 사항들도 요약하였다. 모든 IPND 위원들은 최종 기준을 승인하였다.

## 결 과

### 합의된 진단 기준

**평칭.** 패널들은 다시 한 번 NMO와 NMOSD를 통합하여 사용할 것을 재확인하였다. 혈청학적으로 음성인 NMOSD의 경우 진단의 불확실성과 잠재적으로 이

질적인 질병들이 포함될 가능성이 높아 AQP4-IgG 양성과 음성인 NMOSD에 대해 각각 진단 기준을 따로 마련하였다. 혈청학적 검사가 불가능한 경우를 대비하여 AQP4-IgG의 유무를 알 수 없는 경우에 대한 NMOSD 진단 기준이 추가적으로 사용되었다. AQP4-IgG 음성이지만, 전형적인 NMOSD의 임상 양상을 보이는 환자들에게서 추후 새로운 생체지표가 발견되고 검증될 것에 대비하여 수정될 수 있도록 용어를 재정의하였다.

**임상 양상.** NMOSD의 합의된 진단 기준은 Table 1에 나타내었다. Table e-2는 진단 기준의 개별적인 구성요소들을 해결할 수 있도록 하였다. NMOSD의 진단은 주요 임상 증상 6가지 중 1가지 이상을 동반하며 AQP4-IgG가 양성인 경우 내릴 수 있도록 하였다. 주요 임상 증상 6가지는 중추신경계의 6개 주요 위치에 병변이 있는 경우 나타날 수 있는 증상들이다: 시신경,<sup>19,e28-e31</sup> 척수,<sup>20,e27,e32-e34</sup> 등쪽 연수의 맨아래구역(area postrema),<sup>22,23,e35</sup> 뇌간,<sup>24,e35-e38</sup> 간뇌,<sup>25,26,e39-e44</sup> 대뇌.<sup>27,28,e45-e48</sup> 다음의 임상 양상은 특히 NMOSD를 시사하는 소견들이다: 동시에 발병한 양측성 시신경염, 병변이 시신경 교차부위를 침범하는 경우, 수평 반맹의 시야장애, 심각한 시야장애(시력 20/200 이하),<sup>4,e49-e51</sup> 척수 단면 전체를 침범하는 척수 증후군, 특히 발작성의 긴장 연축을 나타내는 경우,<sup>4,29,e52</sup> 맨아래구역 임상 증후군(16-43% 빈도; 치료반응이 좋지 않은 딸꾹질이나 메스꺼움을 나타내는 경우).<sup>22,23,e35</sup> 그러나 그 어떠한 증상 하나만으로 진단할 수 없으므로, 임상적인 판단은 매우 중요하다. 예를 들어, 수평 반맹은 허혈성 시신경 병증에서 나타날 수 있으며, 양측에 동시에 발생하는 시신경염 역시 MS에서도 나타날 수 있다.<sup>e53</sup>

AQP4-IgG가 음성인 환자나 검사가 불가능한 경우 진단을 위한 조건은 더욱 까다롭다. 이러한 환자들은 2개 이상의 주요 임상 증상이 있고(즉, 공간적으로 분리되어있고, 서로 다른 신경해부학적 구조를 침범해야) MRI 상에서 진단에 합당한 소견이 있어야 한다. 그 중 적어도 하나는 NMOSD의 가장 흔한 3개의 임상 양상(시신경염, MRI 상 LETM을 보이는 횡단성 척수염, MRI에서 연수에 병변이 확인된 맨아래구역 증후군) 중 하나여야 한다.<sup>22,23,30,e35</sup> 진단을 위해 요구되는 2가지 임상 증상은 동시에 나타날 수도 있고(예. 전형적인 Devic 증후군 - 동시에 시신경염과 LETM을 보이는 급성 척수염을 보이는 경우), 여러 번에 걸쳐 나타날 수도 있다.

패널들은 몇 가지 추가적인 결론을 도출하였다. 먼저, NMOSD 진단을 위해서는 적어도 한번 이상은 중추신경계 증상이 발생해야 한다. 무증상성 AQP4-IgG 양성 기간이 NMOSD 증상 발생 수 년 전부터 지속될

**Table 2 Red flags: Findings atypical for NMOSD**

| Red flags (clinical/laboratory)                                                                                                                                                                                                                                               |  |
|-------------------------------------------------------------------------------------------------------------------------------------------------------------------------------------------------------------------------------------------------------------------------------|--|
| 1. Clinical features and laboratory findings                                                                                                                                                                                                                                  |  |
| Progressive overall clinical course (neurologic deterioration unrelated to attacks; consider MS)                                                                                                                                                                              |  |
| Atypical time to attack nadir: less than 4 hours (consider cord ischemia/infarction); continual worsening for more than 4 weeks from attack onset (consider sarcoidosis or neoplasm)                                                                                          |  |
| Partial transverse myelitis, especially when not associated with LETM MRI lesion (consider MS)                                                                                                                                                                                |  |
| Presence of CSF oligoclonal bands (oligoclonal bands occur in <20% of cases of NMO vs >80% of MS)                                                                                                                                                                             |  |
| 2. Comorbidities associated with neurologic syndromes that mimic NMOSD                                                                                                                                                                                                        |  |
| Sarcoidosis, established or suggestive clinical, radiologic, or laboratory findings thereof (e.g., mediastinal adenopathy, fever and night sweats, elevated serum angiotensin converting enzyme or interleukin-2 receptor levels)                                             |  |
| Cancer, established or with suggestive clinical, radiologic, or laboratory findings thereof; consider lymphoma or paraneoplastic disease (e.g., collapsin response mediator protein-5 associated optic neuropathy and myelopathy or anti-Ma-associated diencephalic syndrome) |  |
| Chronic infection, established or with suggestive clinical, radiologic, or laboratory findings thereof (e.g., HIV, syphilis)                                                                                                                                                  |  |
| Red flags (conventional neuroimaging)                                                                                                                                                                                                                                         |  |
| 1. Brain                                                                                                                                                                                                                                                                      |  |
| a. Imaging features (T2-weighted MRI) suggestive of MS (MS-typical)                                                                                                                                                                                                           |  |
| Lesions with orientation perpendicular to a lateral ventricular surface (Dawson fingers)                                                                                                                                                                                      |  |
| Lesions adjacent to lateral ventricle in the inferior temporal lobe                                                                                                                                                                                                           |  |
| Juxtacortical lesions involving subcortical U-fibers                                                                                                                                                                                                                          |  |
| Cortical lesions                                                                                                                                                                                                                                                              |  |
| b. Imaging characteristics suggestive of diseases other than MS and NMOSD                                                                                                                                                                                                     |  |
| Lesions with persistent (>3 mo) gadolinium enhancement                                                                                                                                                                                                                        |  |
| 2. Spinal cord                                                                                                                                                                                                                                                                |  |
| Characteristics more suggestive of MS than NMOSD                                                                                                                                                                                                                              |  |
| Lesions <3 complete vertebral segments on sagittal T2-weighted sequences                                                                                                                                                                                                      |  |
| Lesions located predominantly (>70%) in the peripheral cord on axial T2-weighted sequences                                                                                                                                                                                    |  |
| Diffuse, indistinct signal change on T2-weighted sequences (as sometimes seen with longstanding or progressive MS)                                                                                                                                                            |  |

Abbreviations: LETM = longitudinally extensive transverse myelitis lesions; MS = multiple sclerosis; NMO = neuromyelitis optica; NMOSD = neuromyelitis optica spectrum disorders. These are some common or key findings that should prompt thorough investigation for competing differential diagnoses before making a diagnosis of NMOSD.

**Table 3 Neuroimaging characteristics of NMOSD**

|                                                                                                                                                                                                                                                                                                                                   |
|-----------------------------------------------------------------------------------------------------------------------------------------------------------------------------------------------------------------------------------------------------------------------------------------------------------------------------------|
| <b>Spinal cord MRI, acute</b>                                                                                                                                                                                                                                                                                                     |
| LETM lesion associated with acute TM                                                                                                                                                                                                                                                                                              |
| Increased signal on sagittal T2-weighted (standard T2-weighted, proton density, or STIR sequences) extending over 3 or more complete vertebral segments (figure 1, A and D)                                                                                                                                                       |
| Central cord predominance (more than 70% of the lesion residing within the central gray matter) (figure 1, A-D)                                                                                                                                                                                                                   |
| Gadolinium enhancement of the lesion on T1-weighted sequences (no specific distribution or pattern of enhancement is required) (figure 1, C, E, and F)                                                                                                                                                                            |
| Other characteristic features that may be detected                                                                                                                                                                                                                                                                                |
| Rostral extension of the lesion into the brainstem (figure 1, D and E)                                                                                                                                                                                                                                                            |
| Cord expansion/swelling                                                                                                                                                                                                                                                                                                           |
| Decreased signal on T1-weighted sequences corresponding to region of increased T2-weighted signal (figure 1F)                                                                                                                                                                                                                     |
| <b>Spinal cord MRI, chronic</b>                                                                                                                                                                                                                                                                                                   |
| Longitudinally extensive cord atrophy (sharply demarcated atrophy extending over $\geq 3$ complete, contiguous vertebral segments and caudal to a particular segment of the spinal cord), with or without focal or diffuse T2 signal change involving the atrophic segment (figure 1, G and H)                                    |
| <b>Optic nerve MRI</b>                                                                                                                                                                                                                                                                                                            |
| Unilateral or bilateral increased T2 signal or T1 gadolinium enhancement within optic nerve or optic chiasm (figure 1, I-K); relatively long lesions (e.g., those extending more than half the distance from orbit to chiasm) and those involving the posterior aspects of the optic nerves or the chiasm are associated with NMO |
| <b>Cerebral MRI: NMOSD-typical brain lesion patterns (increased signal on T2-weighted MRI sequences unless otherwise noted)</b>                                                                                                                                                                                                   |
| Lesions involving the dorsal medulla (especially the area postrema), either small and localized, often bilateral, or contiguous with an upper cervical spinal cord lesion (figure 2, A-E)                                                                                                                                         |
| Periependymal surfaces of the fourth ventricle in the brainstem/cerebellum (figure 2, F-H)                                                                                                                                                                                                                                        |
| Lesions involving the hypothalamus, thalamus, or periependymal surfaces of the third ventricle (figure 3, A and B)                                                                                                                                                                                                                |
| Large, confluent, unilateral, or bilateral subcortical or deep white matter lesions (figure 3, C and D)                                                                                                                                                                                                                           |
| Long (1/2 of the length of the corpus callosum or greater), diffuse, heterogeneous, or edematous corpus callosum lesions (figure 3E)                                                                                                                                                                                              |
| Long corticospinal tract lesions, unilateral or bilateral, contiguously involving internal capsule and cerebral peduncle (figure 3F)                                                                                                                                                                                              |
| Extensive periependymal brain lesions, often with gadolinium enhancement (figure 3, G-I)                                                                                                                                                                                                                                          |

Abbreviations: LETM = longitudinally extensive transverse myelitis lesions; NMOSD = neuromyelitis optica spectrum disorders; STIR = short tau inversion recovery.

수 있으며,<sup>654</sup> 이러한 무증상성 혈청학적 양성인 상태는 아직 알려진 바가 많지 않다. 둘째, NMOSD에 합당한 MRI 병변을 보이는 무증상성 환자들의 경우, 이 환자들의 임상 경과가 알려져 있지 않기 때문에 NMOSD 진단을 확신할 수 없다. 셋째, NMOSD의 진단을 보장하는 증상은 없다. 따라서, AQP4-IgG가 검출되지 않은 단상의 임상적 발병은 진단이 불가능하다. 마지막으로, NMOSD의 진단을 배제할 수 있도록 하는 증상은 없으나 몇 가지 증상은 다른 가능성을 높이는 적신호로 간주된다(Table 2). 이러한 적신호로 간주되는 경우는 하나의 증상보다는 시간에 따른 경과에 의해 결정되는 경우가 많다.<sup>655-663</sup> 수개월에서 수년에 걸쳐 서서히 진행하면서 신경학적으로 악화하는 경과를 보이는 NMOSD에서 매우 드물다(1-2%).<sup>31</sup> 그러나 1개 혹은 그 이상의 적신호가 있더라도, 감별이 필요한 질환의 가능성을 철저히 조사

하고, 임상적 근거의 경중을 따진 이후 NMOSD로 진단하는 것은 가능하다. 전신 자가 면역 질환의 여부나 특정 뇌척수액 자료와 병리학적 결과들 역시 NMOSD의 진단 가능성에 영향을 미친다. AQP4-IgG의 혈청학적 상태에 관계 없이, 임상 증후군에 대한 다른 질환의 가능성이 배제되고, 진단 기준에 합당할 때 NMOSD로 진단할 수 있다.

**신경영상 및 신경심리 검사.** MRI의 병변 양상은 중추신경계 탈수초성 질환을 감별진단하는 데 중요한 지표이다. 몇 가지의 뇌, 시신경, 척수의 병변 양상은 NMOSD를 강하게 시사한다(Table 3; Figure 1-3). 척수에서 급성 척수염과 관련된 LETM을 보이는 경우(Figure 1), NMOSD에 매우 특징적이며, 성인 MS에서는 매우 드물다.<sup>2</sup> 이러한 특징적인 병변은 중심 회질을 침범하며, 척수 부종을 동반하고, T1강조영상에서 척수 중심이 저음영으로 관찰되며, 가돌리늄 정주 시 조영증강을 보이고, 경우 병변이 뇌간으로 확장되는 것 등이다.<sup>4,32,33,e35,e64-e67</sup> 이와 반대로 MS의 척수 병변은 1개의 척추 분절보다 짧으며, 척수 주변부의 백질의 후주와 같은 신경경로를 침범하고, 무증상일 수 있다(Table 3; MS나 다른 질병과 관련된 신경영상소견의 적신호 참조).<sup>34-36,e68-e70</sup> LETM 양상이 NMOSD의 특징이지만, AQP4-IgG 양성인 환자들의 첫 증상 발생의 7-14%, 재발의 8%에서는 LETM 정의에 부합하지 않는다.<sup>32,37</sup> 따라서 짧은 척수염을 보이는 환자들에게서도 NMOSD는 감별 진단에 반드시 포함되어야 한다. MRI 촬영이 되는 시점도 환자의 임상적 상태와 연관성이 있을 수 있다. 간혹, NMOSD에서도 3개의 척추 분절 이하의 병변이 보일 수 있는데, 이는 급성 척수염의 진행 초기나, LETM 병변이 비연속적인 병변으로 나누어지는 임상적으로 관해가 되는 시기에 MRI가 촬영 되었기 때문일 가능성이 있다.<sup>37,e71</sup> 진행성 MS 환자들 중에 여러 척수 병변이 붙으면서 LETM처럼 보이는 경우가 있다;<sup>e72</sup> 측면과 시상면 영상을 모두 고려하여 병변의 범위를 판단해야 한다. LETM의 MRI 패턴은 감염질환, 육아종질환, 신생물질환, 신생물탈립질환, 급성 파종 뇌척수염, 척수경색증, 경막 동정맥루 등에서도 보일 수 있다.<sup>e63</sup>

시신경염 발생 동안, 지방 억제 T2-강조영상 안와 MRI에서 시신경의 신호강도가 증가되어 있는 것을 볼 수 있으며, 가돌리늄 조영제를 사용하면 T1강조영상에서 조영증강도 확인할 수 있다(Figure 1). 양측 시신경의 침범, 시신경의 후방부에 치우친 병변(특히, 시신경 교차 부위로 확장되는 경우) 혹은, 시신경 전반에 걸친 광범위한 병변(전체 길이의 반 이상)은 NMOSD를 시사하는 소견들이다(Table 3).<sup>e51,e73,e74</sup>

2006년에 제정된 진단 기준에 따르면, 정상적인

Figure 1 Spinal cord and optic nerve MRI patterns in neuromyelitis optica spectrum disorder

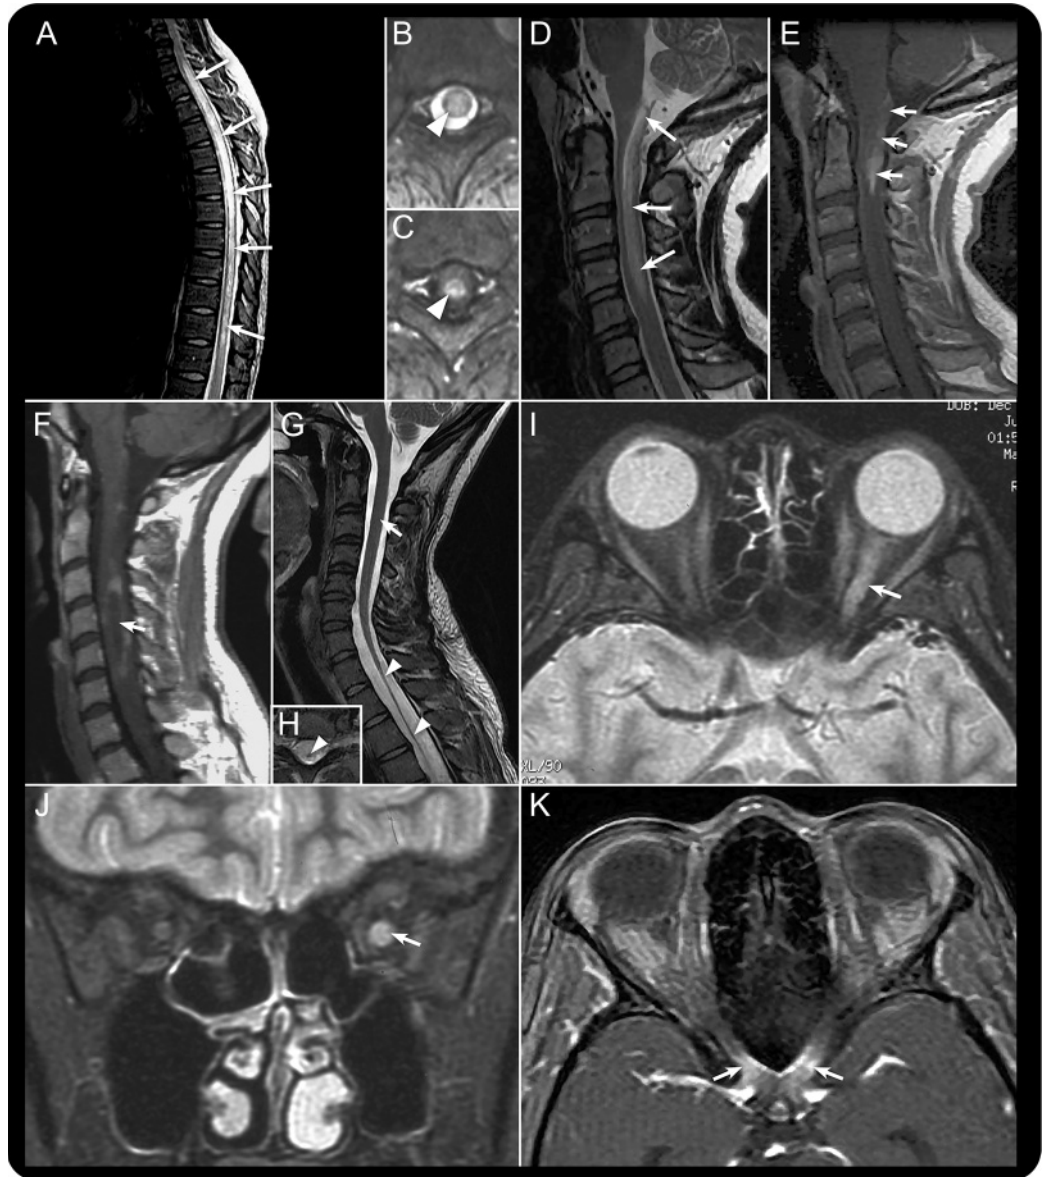

Spinal cord imaging in the context of acute myelitis in neuromyelitis optica spectrum disorders (NMOSD) usually reveals a longitudinally extensive transverse myelitis (LETM) lesion extending over 3 or more vertebral segments. Sagittal T2-weighted MRI of the thoracic spinal cord (A) demonstrates a typical LETM lesion involving most of the thoracic spinal cord (arrows). LETM lesions have a predilection for the central cord, as shown by axial T2-weighted (B; arrowhead) and T1-weighted MRI with gadolinium (C; arrowhead). Cervical LETM may extend into the medulla, a characteristic NMOSD pattern demonstrated in D (arrows; sagittal T2-weighted MRI) and E (arrows; sagittal T1-weighted MRI with gadolinium). Acute LETM lesions can be associated with intraslesional hypointensity as shown by sagittal T1-weighted MRI (F; arrow); in this example, a rim of gadolinium enhancement surrounds the hypointense region. Chronic sequelae of LETM may include longitudinally extensive segments of spinal cord atrophy as shown by T2-weighted MRI using sagittal (G; the 2 arrowheads indicate the atrophic segment and the top arrow indicates the normal diameter of unaffected cervical spinal cord) and axial planes (H; arrowhead shows an atrophic spinal cord). Fast spin echo fat-suppressed T2-weighted MRI in the axial (I) and coronal (J) planes shows increased signal throughout most the length of the left optic nerve, especially its posterior portion (arrows). Axial T1-weighted MRI with gadolinium shows enhancement of the optic chiasm (K; arrows). These images are from 2 different patients experiencing acute optic neuritis in the setting of NMOSD.

뇌 MRI나 비특이적인 백질 병변이 주요 진단 기준이었다.<sup>2</sup> 60%의 NMOSD 환자들은 백질에 무증상 병변이 증가하고, 16%의 환자들은 Barkhof MS MRI 기준을 만족하게 된다.<sup>33,38,39,e75-e76</sup> 뇌 MRI에서 MS에 합당

한 백질 병변을 보이는 것이 NMOSD를 배제할 수 있는 소견은 아니나, 적신히 고려해야 하며 이러한 경우 확실하게 MS로부터 NMOSD를 감별하기 위해서는 추가적인 근거들이 필요하다.<sup>33,38,e64,e76,e77</sup> MS로부

Figure 2 Dorsal medulla, area postrema, and other brainstem lesions in neuromyelitis optica spectrum disorder

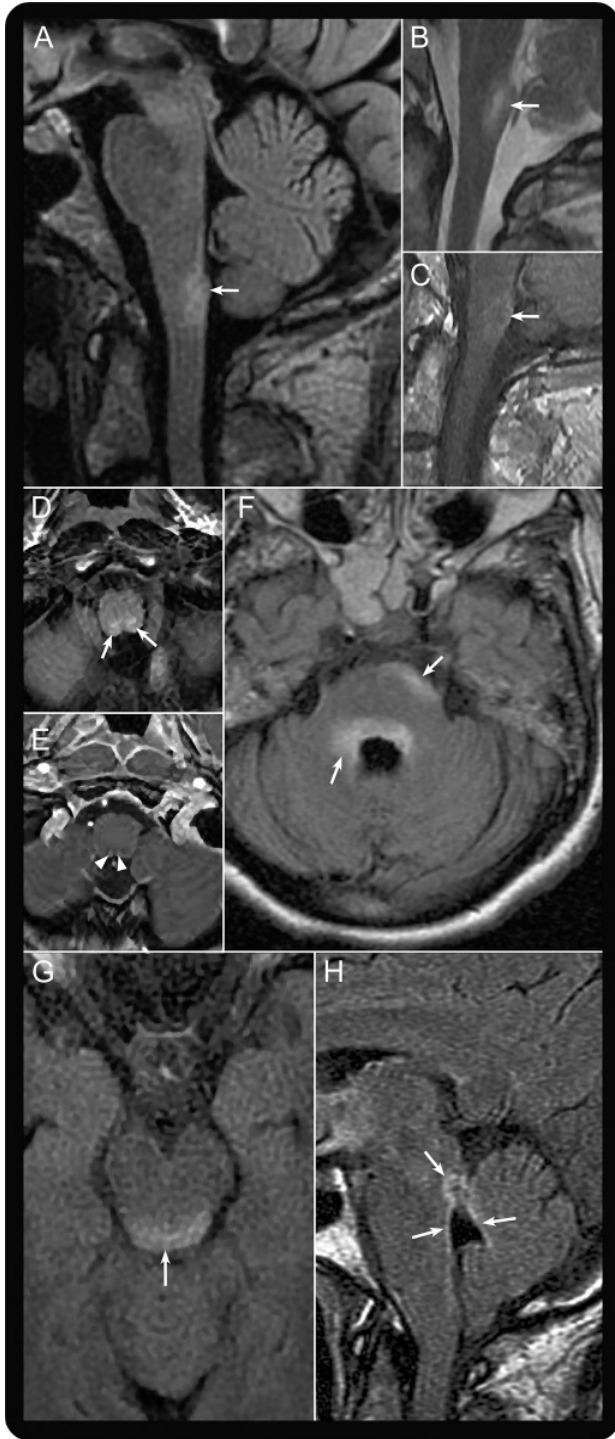

Sagittal T2-weighted fluid-attenuated inversion recovery (FLAIR) MRI shows a lesion in the dorsal medulla (A; arrow). Sagittal T2-weighted (B) and T1-weighted MRI with gadolinium (C) each demonstrate an acute lesion (arrows) associated with area postrema clinical syndrome. Axial T2-weighted FLAIR (D; arrows) and T1-weighted MRI with gadolinium (E; arrowheads) show dorsal medulla involvement in a patient with acute area postrema clinical syndrome. Axial T2-weighted FLAIR MRI shows periependymal lesions involving the pons (F; arrows) and dorsal midbrain (G; arrow). Sagittal T2-weighted FLAIR MRI shows increased signal surrounding the fourth ventricle (H; arrows).

터 NMOSD를 감별하는데 있어 병변의 정성적인 특징 분석이 도움이 된다. 먼저, 등쪽 연수/맨아래구역 (Figure 2),<sup>22,33,40,e36,e73,e78</sup> 뇌간의 뇌실막 주변부(Figure 2),<sup>33,40,e36,e73</sup> 간뇌,<sup>39,40,e79</sup> 대뇌 반구<sup>e80</sup> (Figure 3), 뇌량<sup>39,41</sup> 혹은 피질척수로의 전반에 걸쳐 보이는 긴 병변처럼 (Figure 3),<sup>33,34</sup> NMOSD에 질병특유적이지는 않으나, 전형적인 패턴을 보이는 병변은 7%의 환자들에게서 나타나는데, MS에서는 예외적으로 생각된다(Table 3).<sup>39</sup> 크고, 서로 합쳐지고, 종창모양의 대뇌병변은 NMOSD를 시사하나, 병변 소견 단독으로는 비정형 MS 병변과의 구별이 어려울 수 있다. 특히, AQP4-IgG 음성인 환자에게서는 더욱 어려울 수 있다.<sup>27,33,39,42,e46,e812e83</sup> 두 번째로, 수직방향으로 배치된 뇌실 주위 백질 병변 (Dawson 손가락), 아래 측두엽에 위치한 뇌실 주위 병변, 그리고 피질 병변 등처럼 MS 특이적인 병변들은 NMOSD에서는 드물다.<sup>33,38,43,e64</sup> 최근 7T MRI 연구들에서 피질 병변(MS에서는 흔하나, NMOSD에서는 드문)과 백질 병변(MS 판은 뇌실 주변에 위치하며 세정맥에 의해 가로질러지는 반면 NMOSD 병변은 피질하에 위치하며 세정맥이 없음)이 NMOSD와 MS 사이에 차이가 있었다.<sup>e84,e85</sup> 그러나, 이러한 방법론은 아직 널리 확립된 방법은 아니며 추후 검증이 필요하다.

패널들은 비통상적인 MRI 기법이나 광응집(optical coherence) 단층 촬영, 시각 유발 전위와 같은 신경생리 검사의 이용도 고려하였다. 그러나 이러한 기법들은 아직 근거, 특이도, 및 신뢰성이 부족하여 개정된 진단 기준에 포함되지 않았다.

#### AQP4-IgG와 실험실 검사 결과

AQP4-IgG 측정법의 기술적인 발달은 진단의 특이도를 감소시키지 않으면서 민감도를 증가시켰다.<sup>44</sup> 패널들은 가능하다면 자가면역 항체 발견이 최적화된(혼합 분석 결과 평균 민감도 76.7%; MS 클리닉 코호트 기반 0.1% 위양성) 세포-기반 혈청 측정(현미경 혹은 흐름세포측정법-기반) 방법을 권유하고 있다.<sup>12-14,44,45</sup> 그러나 아직 세포-기반 측정법이 널리 보급되지는 못한 상태이다.

간접적인 면역형광 측정법과 ELISA는 그 민감도가 낮고(평균 민감도 각각 63-64%), 간혹 낮은 역가에서 위양성이 나타나는 경우가 있다(0.5%-1.3%; ELISA).<sup>12-14,44,45,e86</sup> 패널들은 이러한 방법들을 이용하는 경우, AQP4-IgG와 관련이 적은 NMOSD의 임상 증상(예. 시신경염, LETM을 포함한 척수염, 맨아래구역 증후군 이외의 양상)을 보이는 환자나 다른 질병을 시사하는 소견이 많은 환자들에게서 낮은 역가에서 ELISA 양성을 보인다면 해석에 있어 주의가 필요함을 강조하였다. 이

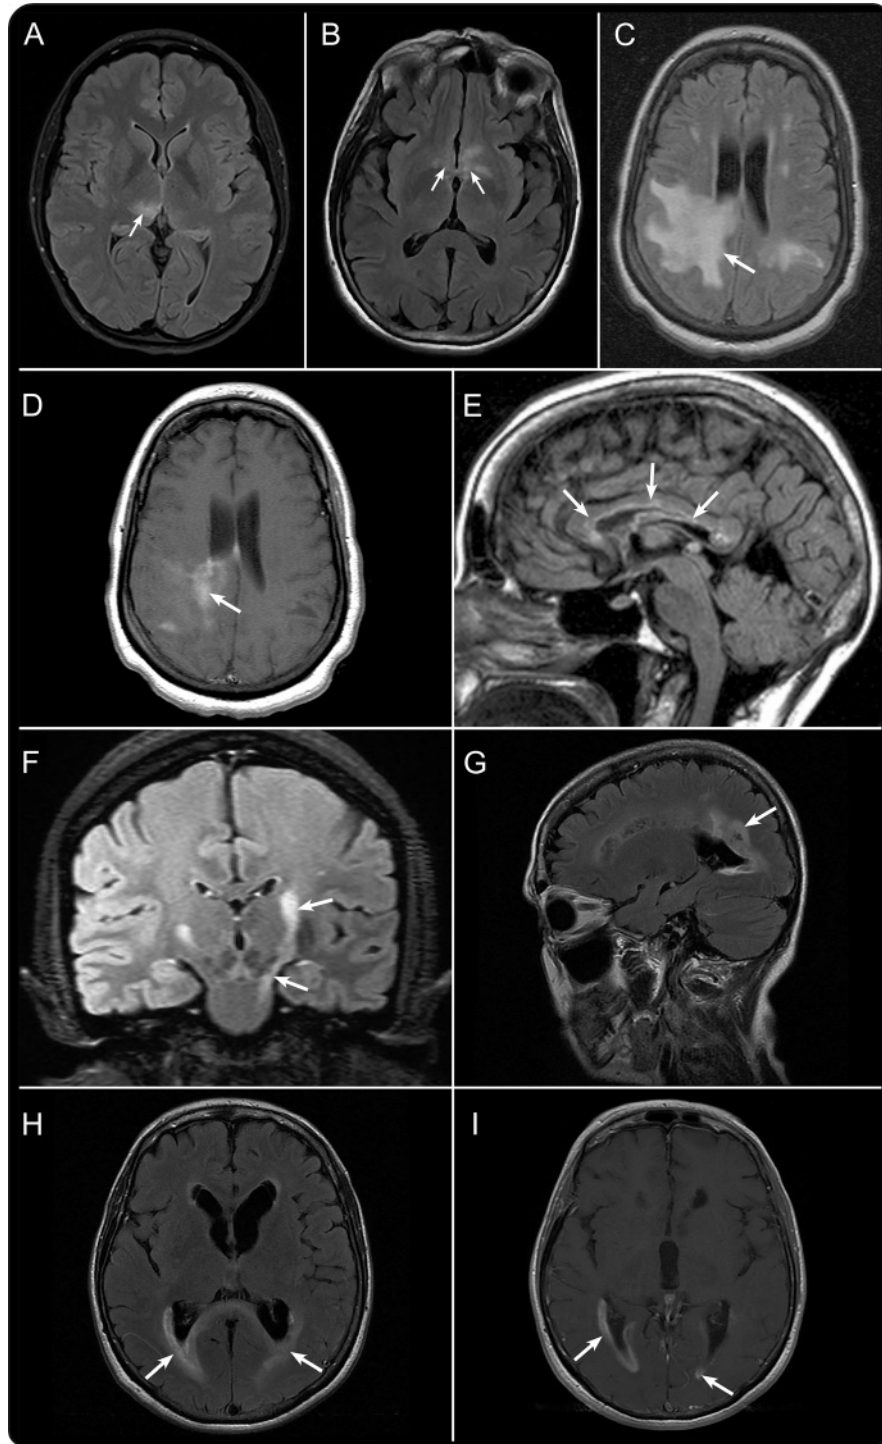

A variety of brain lesion patterns are associated with neuromyelitis optica spectrum disorder. Axial T2-weighted fluid-attenuated inversion recovery (FLAIR) MRI from 2 patients demonstrates lesions involving the right thalamus (A; arrow) and the hypothalamus (B; arrows). Axial T2-weighted FLAIR MRI shows an extensive subcortical white matter lesion (C; arrow) that enhances after gadolinium administration on T1-weighted sequences (D; arrow). Chronic longitudinally extensive and linear corpus callosum lesions are depicted on sagittal T2-weighted FLAIR MRI (E; arrows). Coronal T2-weighted FLAIR MRI shows longitudinal involvement of the corticospinal tract extending to the cerebral peduncle and pons (F; arrows). Acute periependymal cerebral lesions from one patient are depicted using sagittal (G; arrow) and axial (H; arrows) T2-weighted FLAIR MRI and axial T1-weighted MRI with gadolinium (I; arrows).

상적으로는 확진을 위해서 적어도 한 개 이상의 AQP4-IgG 측정법을 사용할 것을 권장하고 있다. 현재로서는 세포-기반 측정법이 가장 높은 민감도와 특이도를 보이며, 검사를 위해 특화된 검사실에 의뢰가 필요할 수 있다.

NMOSD의 진단 기준을 만족하지만, 최선의 방법으로 AQP4-IgG 검사 결과 음성이 나왔거나, 검사가 불가능하면 때때로 진단이 어려울 수 있다.<sup>46</sup> 단상의 NMO를 보이는 환자에게서 재발을 보이는 환자에 비해 AQP4-IgG가 음성인 경우가 더 많다.<sup>37</sup> NMO의 증상을 보이지만, 대부분 AQP4-IgG 음성인 환자의 소수에서 혈청 수초 희소돌기세포 당단백질(myelin oligodendrocyte glycoprotein, MOG) 항체가 양성이었으며, 이 환자의 임상 양상은 AQP4-IgG 양성 환자와 조금 달랐다(낮은 연령, 여성 편중이 덜함, 재발이 적음).<sup>47-49,687</sup> 이러한 사실들은 NMOSD의 임상 양상과 신경영상 소견을 보이는 AQP4-IgG 음성 환자들의 일부에서 기저 병리기전이 다를 수 있다는 것을 시사한다;<sup>46</sup> MOG를 포함한 다른 항체들의 병리학적 기전은 아직 명확하지 않다.<sup>688</sup> IPND 용어는 다른 검증된 생체지표(예, 특정 항체와 관련된 NMOSD)를 포함할 수 있도록 고안되었다.

간혹 처음에 AQP4-IgG가 음성이었다가 나중에 양성으로 나타나는 환자들이 있다. 일부는 기술적인 원인에 의해 설명될 수 있으나, 체내 항체의 양도 임상적으로 재발하면 증가하고, 면역억제 치료 후에는 감소하기도 한다.<sup>50</sup> 이전 검사에서 음성인데도 불구하고 재발한 경우에는, B-세포나 항체와 관련된 치료(혈청 교환술, 면역억제 약물)를 시작하기 전에 재검사를 고려해야 한다.<sup>51</sup> 임상적으로 NMO가 진단된 환자에게서 뇌척수액에서는 AQP4-IgG가 측정되고 혈청에서는 측정되지 않는 환자들도 있었으나, 이는 흔하지 않다.<sup>52,689-691</sup> 일률적으로 모든 환자의 뇌척수액에서 AQP4-IgG검사를 하는 것은 권장되지 않으나, 혈청에서 음성인 환자들, 특히 혈청 내에 다른 항체가 있어 해석이 어렵거나 위양성이 나타나는 환자들에게서 선택적으로 시행해 볼 수 있다.

패널들은 뇌척수액 검사에서 올리고클론띠가 측정되지 않은 것은 NMOSD를 시사하는 소견이며(간혹 증상이 있는 경우 일시적으로 양성으로 나타나기도 함), 띠가 있는 경우 적신호로 간주되기도 하나, 민감도와 특이도는 그리 높지 않다.<sup>4,53</sup> 뇌척수액 검사에서 뇌척수액세포증가증 > 50 leukocytes/ $\mu$ L (NMOSD에서는 35% 정도에서 나타남) 또는 중성구나 호산구의 존재 등이 관찰되면(>5/ $\mu$ L; 빈도 44%와 10%, 순서대로) NMOSD와 MS를 구분하는 데 도움이 된다.<sup>4,53</sup> 뇌척수액의 아교세포섬유산성단백질은 진단적 혹은 예후를 예측하는 생체지표로 생각되나 증상 발생 수일에서 수주일 동안만 증가되어 있다.<sup>692,693</sup>

## 소아 NMOSD 진단 기준

소아 워킹 그룹의 구성원들은 대부분의 소아 NMOSD의 임상 양상, 신경영상검사와 다른 검사 결과들이 성인과 유사함을 확인하였다. 성인 NMOSD에 비해 여성 편중은 조금 낮았으며(3:1의 비율, 성인은 9:1),<sup>54,694</sup> 단상으로 나타나는 경우가 성인에 비해 많았고,<sup>54,55,695</sup> 급성기 뇌척수액 검사 이상은 NMOSD에 특징적인 경우가 더 많았다.<sup>54-56</sup> 워킹 그룹은 성인 NMOSD의 진단 기준을 소아에게 적용 시 문제점을 찾았으며, 특히 소아 NMOSD에서 급성 척수염 시 MRI에서 보이는 LETM이 덜 진단적임을 발견하였다. 대략 15% 정도의 소아 MS 환자에서만 재발 시 LETM을 보이며, 이는 단상의 ADEM에서도 관찰되며, AQP4-IgG는 단상의 LETM을 보이는 경우 거의 발견되지 않는다.<sup>55</sup> 국제 기준에 따라, 다발성의 탈수초성 질환의 재발과 뇌병증이 있어야 진단이 가능한 소아 ADEM이더라도,<sup>57</sup> AQP4-IgG가 있는 경우에는 NMOSD 진단을 더 고려해야 한다. 이에 대해서는 전향적으로 검증하는 연구가 더 필요하리라 생각된다. AQP4-IgG 양성 소아 환자들을 대상으로 한 한 연구에서, 45%의 환자가 뇌병증을 포함한 대뇌의 증상을 호소하였다.<sup>56</sup> 이러한 사실들을 고려할 때, 최근 제안된 NMOSD의 진단 기준은 소아 환자에게도 적당하리라 생각된다. 확실한 진단을 위해서는 시신경염과 LETM을 동반한 ADEM과 비슷한 증상을 보이는 AQP4-IgG 음성인 소아 환자에게 있어 장기적인 추적 관찰을 통해 시간에 따라 분산되어 나타나는 임상 양상과 AQP4-IgG의 상태를 확인해야 한다.

## 단상의 NMOSD

두 번째 증상이 발생하는 경우, 재발성의 질병으로 정의할 수 있고, 이는 전형적인 NMO를 제외하고는 MS의 진단을 가능하게 하였다. 단상의 NMOSD의 진단을 위한 정의는 아직 정확히 내리기는 어려우나, 대략 5-10% 정도의 환자들은 단상 NMOSD로 생각된다. 초기 양측성 시신경염 및 척수염이 나타나는 소견이, 재발하는 NMOSD와 구별하는데 있어 필수적인지 여부는 아직 명확하지 않다. 이와 비슷한 맥락으로, 지표 임상 사건 사이의 간격이 어느 정도까지 단상 NMO로 볼 수 있는지에 대한 기준도 일괄되게 정의되어 있지 않으며, 향후 임상 경과를 예측하는 인자로도 검증되지 않았다. AQP4-IgG가 양성인 경우 재발을 더 잘하고(예, LETM 1년 내 60%에서 재발),<sup>20</sup> 경우에 따라서는 첫 사건 이후 재발이 10년 뒤에 나타난 보고도 있다.<sup>634</sup>

몇몇 연구들에서 단상의 NMO는 재발하는 NMO에 비해, 성비가 비슷하고, 상대적으로 젊고, 동시에 척수염과 양측성 시신경염(일측성 시신경염에 비해)을 나타



내고, 낮은 자가면역질환 동반율, 낮은 AQP4-IgG 양성율을 보였다.<sup>4,37,e96</sup> 이러한 환자들의 일부는 MOG-IgG 처럼 다른 항체를 보이기도 한다.<sup>47</sup>

단상 NMOSD가 인식이 가능한 하나의 임상 양상이지만, 지속적으로 단상의 NMOSD로 남아 있게 될지 재발할지를 명확하게 예측할 수 있는 방법은 현재까지는 없다. 첫 증상 발생 후 다시 새로운 증상이 발생하는 경우, 4주 이후에는 재발로 간주한다. 패널들은 또한 5년 동안 재발이 없는 경우에 어느 정도 단상의 NMO를 가정할 수 있다는 것을 알아냈다. AQP4-IgG 양성 환자들은 재발의 가능성에 대해 항상 염두에 두어야 하며, 장기간 임상적 관해가 있더라도 예방적 치료에 대해 항상 고려해야 한다.

### 전신성 면역질환과 관련된 NMOSD

몇몇 관찰연구에 따라 AQP4-IgG 양성인 NMOSD 환자들에게서 SLE, SS, 중증근무력증이 동반 될 수 있으며, 이러한 경우 NMOSD의 진단을 더욱 견고하게 해준다.<sup>58,e97,e98</sup> 중추신경계 증상들은 SLE나 SS의 직접적인 합병증(예. 관련된 혈관염)으로 보기보다는 NMOSD에 의한 것으로 보는 것이 더 타당하다. NMOSD가 의심되는 환자에게 있어 중증근무력증의 증상을 보인다면, 혈청 내 아세틸콜린 수용체에 대한 항체가 발견되는 것은 NMOSD를 시사하는 소견들이다.<sup>e99-e101</sup>

### 병리소견

생검이나 부검을 통해 얻은 AQP4-IgG 양성인 NMOSD 환자의 활성화된 탈수초성병변에서의 병리소견은 AQP4 면역활성도의 소실과 혈관주위 보체 활성화를 보인다.<sup>e20,e21</sup> 신경교섬유질산성단백질에 대한 염색을 통해 끝이 잘린 별세포 돌기나 세포소실 소견으로 대면되는 별세포병리가 관찰된다.<sup>59,e20</sup> 이러한 활성화된 탈수초 병변은 MS로부터 NMOSD를 구별할 수 있는 소견이다; 아직 혈청학적으로 음성인 환자들의 자료는 없는 상태이다. 중성구와 호중구가 발견되는 피사조직은 NMOSD를 시사하지만, 발견되지 않을 수도 있다.<sup>59</sup> 이러한 면에서 척수 병변들은 척수보다 위쪽에서 발견되는 병변과 차이를 보일 수 있다.<sup>e102,e103</sup> 심한 척수염 환자나 백질 뇌병증 환자의 혈청에서 AQP4-IgG가 발견되는 경우 일반적으로 생검을 할 필요는 없다.<sup>e19,e104,e105</sup> 중추 신경계 생검 이후 AQP-4 면역염색은 항상 시행되는 것은 아니며, 선택적인 기관들에서만 가능하다. 패널들은 중추신경계 생검을 추천하지는 않으나, 비전형적인 증례에서 전문가에 의한 뇌 혹은 척수조직생검 자료의 병리적 검토는 NMOSD를 진단하고 다른 진단을 배제하는데 도움이 될 수 있다.<sup>60</sup>

### 시신경척수 MS

시신경척수 MS는 비교적 아시아 국가에서 흔한 MS의 한 형태를 지칭하기 위해 일본에서 처음 사용되었다.<sup>11,e106</sup> 이는 뇌를 침범하지 않고, 재발하는 시신경염과 척수염이 있는 경우로 정의되었고, 일부 연구자는 뇌간의 침범이 있는 경우도 포함하였다.<sup>e107</sup> 시신경척수 MS의 발견은 일반적인 MS와 달리 선택적으로 시신경과 척수에만 재발하여, NMO의 진단 기준에는 불충분한, 재발하는 질병을 서양과 일본 모두에서 발견한 중요한 사건으로 간주된다.

척수 병변의 길이와 AQP4-IgG 양성을 진단 기준에 포함한 최근의 NMO 진단 기준은 기존의 시신경 척수 MS의 진단 기준에 비해 더욱 특이도를 높였다. 아시아 국가의 많은 임상 의사와 연구자들은 그들의 진료와 연구에 있어, 이제 시신경 MS라는 표현보다 NMO라는 용어를 더 많이 사용한다. 아시아에서 정의된 것과 비슷하게, NMO의 임상 양상과 뇌 MRI 병변들은 모두 서양에서도 비슷하게 관찰된다.<sup>22,23,33,39,e108</sup> 패널들은 시신경 MS라는 용어는 역사적으로는 중요하지만, MS와 NMO의 치료가 다르므로, 이를 결정하기 위해 MS와 NMO를 구별할 필요성을 강조하였고, 시신경 MS라는 용어는 대체하기로 하였다.<sup>15-18,e24-e26</sup>

## 고 찰

AQP4-IgG의 높은 특이도는 NMO의 임상적인, 신경 영상학적인 스펙트럼을 넓히는데 기여하였다. 합의된 NMOSD의 정의는 기존의 전통적인 NMO와 최신 NMOSD의 정의를 통합하였다. 이러한 것은 하나의 영역에 제한된 거의 모든 중추신경계 병변(예. 재발성 횡단 척수염)을 보이면서, AQP4-IgG 양성인 환자들도 NMOSD로 진단할 수 있도록 하였다. 또한 처음으로 시신경이나 척수의 침범이 없는 환자들도 NMOSD로 진단이 가능하도록 하였다. 이러한 결론을 내린 이유는 다음과 같다: (1) AQP4-IgG 양성인 NMO와 NMOSD로 진단된 환자들 사이에 확립된 생물학적 차이가 없다 (2006년, 2007년 진단 기준), (2) AQP4-IgG 양성인 환자들 중 시신경과 척수가 아닌 중추신경계 병변이 있더라도 일반적인 NMO 환자들과 향후 재발을 예측하는데 있어서 다르지 않다. (3) 재발하는 NMO와 NMOSD에 대한 면역치료 전략이 AQP4-IgG의 혈청학적 상태와 관련 없이 동일하다. AQP4-IgG 음성인 환자들은 진단 기준의 특이도를 높이기 위해, 혈청학적으로 양성인 환자들의 가장 흔한 3가지 임상 양상인, 시신경염, LETM을 포함하는 횡단 척수염, 팬아레구역 증후군 중 1개 이상이 MRI에서 보이는 병변과 관련이 있으면 진단 가능

하다. 이러한 기준은 소아에게도 약간의 주의와 함께 적용 가능하다. 패널들은 특히 AQP4-IgG 양성인 환자들에게 단상의 NMOSD로 진단하는 것에 주의해야 하며, NMOSD 진단 기준에 부합하는 환자에게 시신경척수염의 용어를 쓰는 것을 지양하도록 하였다.

IPND 진단 기준은 특발성 횡단성 척수염, 특발성 시신경염, 혹은 비전형적인 MS로 진단받은 환자들이 더 초기에, 정확하게 진단될 수 있도록 하였다. 이로 인해 AQP4-IgG 양성인 환자들에서 첫 중추신경계 증상이 발현되었을 때, 재발하지 않도록 면역치료와 같은 특이적인 예방치료를 받을 수 있게 되었다. 진단 기준은 AQP4-IgG 양성인 그리고 음성인 NMOSD 환자들을 MS로부터 더 높은 특이도로 감별할 수 있도록 재정되었다. 최근 관찰연구의 결과 인터페론-베타, 나탈리주맙, 핀글리모드와 같은 치료들이 NMO를 악화시킬 수 있어, 초기에 적절한 진단을 하는 것은 중요하다.<sup>15-18,24-e26</sup>

IPND 진단 기준은 더욱 포괄적이고 유사한 역학 연구들을 촉진하여, 통일된 증례 정의와 정의된 용어들의 풀이를 제공할 수 있을 것이다. 새로운 개념을 이용하여 AQP4-IgG 음성 NMOSD으로 진단된 환자들의 임상, 신경영상, 검사 결과들에 대한 더 자세한 기술들이 있어야 이러한 이질적인 환자군의 특성을 잘 알 수 있다. 이러한 것은 특히, AQP4-IgG 양성으로 전환되거나 다른 관심 있는 자가면역 항체가 나타나는 빈도를 밝히고, 다른 질병으로 진단되는 표현형 개체를 찾기 위해 중요하다.

IPND 진단 기준을 재정하는데 바탕이 된 많은 관찰 연구들은 상대적으로 적은 수의 환자를 대상으로 한 것이 많았다. 패널들은 향후 여러 가지 대규모 전향적인 연구와 평가 전략을 권장하였다. 이러한 연구로는 다음과 관련된 것들이 있으나, 이로 제한되지는 않는다: (1) 재정된 진단 기준을 AQP4-IgG 양성 및 음성 NMOSD 환자들에게 순차적으로 적용하여 추적검사에서 진단이 유지되는지 혹은 다른 진단이 발생하는지, (2) 혈청 MOG-IgG의 면역학적 발병기전과 질병과의 연관성에 대한 확인, (3) 실제 임상에서 AQP4-IgG 위음성과 위양성이 얼마나 나타나는지, (4) 서로 다른 정의들이 임상 경과(단상 vs. 재발)를 예측하는지, 서로 다른 아형의 특성을 결정하는지, (5) NMOSD의 면역병리를 더욱 연구하여 발견하지 못한 이질성이 없는지, 특히 AQP4-IgG 음성인 환자군에서 이질성이 없는지 연구해 볼 수 있겠다. 이런 진단 기준 검증에 대한 접근과 다른 여러 접근들이 과학적 진보의 다음 시대에 상응하는 NMOSD 진단 기준을 더욱 개선시켜 나가리라 생각한다.

## AUTHOR CONTRIBUTIONS

D. Wingerchuk participated in study concept and design, obtaining funding, acquisition and analysis of data, drafting and revising the manuscript, and coordinating the study. B. Banwell participated in the acquisition and analysis of data and writing and critical review of the manuscript for important intellectual content. J. Bennett participated in the acquisition and analysis of data and writing and critical review of the manuscript for important intellectual content. P. Cabre participated in the acquisition and analysis of data and writing and critical review of the manuscript for important intellectual content. W. Carroll participated in the acquisition and analysis of data and writing and critical review of the manuscript for important intellectual content. T. Chitnis participated in the acquisition and analysis of data and writing and critical review of the manuscript for important intellectual content. J. de Seze participated in the acquisition and analysis of data and writing and critical review of the manuscript for important intellectual content. K. Fujihara participated in the acquisition and analysis of data and writing and critical review of the manuscript for important intellectual content. B. Greenberg participated in the acquisition and analysis of data and writing and critical review of the manuscript for important intellectual content. A. Jacob participated in the acquisition and analysis of data and writing and critical review of the manuscript for important intellectual content. S. Jarius participated in the acquisition and analysis of data and writing and critical review of the manuscript for important intellectual content. M. Lana-Peixoto participated in the acquisition and analysis of data and writing and critical review of the manuscript for important intellectual content. M. Levy participated in the acquisition and analysis of data and writing and critical review of the manuscript for important intellectual content. J. Simon participated in the acquisition and analysis of data and writing and critical review of the manuscript for important intellectual content. S. Tenembaum participated in the acquisition and analysis of data and writing and critical review of the manuscript for important intellectual content. A. Traboulsee participated in the acquisition and analysis of data and writing and critical review of the manuscript for important intellectual content. P. Waters participated in the acquisition and analysis of data and writing and critical review of the manuscript for important intellectual content. K. Wellik participated in the acquisition and analysis of data and writing and critical review of the manuscript for important intellectual content. B. Weinschenker participated in study concept and design, obtaining funding, acquisition and analysis of data, drafting and revising the manuscript, and coordinating the study.

## ACKNOWLEDGMENT

The authors thank the Guthy-Jackson Charitable Foundation for organizational and financial support; Dr. Katja van Herle, Dr. Valerie Pasquetto, Dr. Michael Yeaman, and Jacinta Behne for assistance; Prof. Jun-ichi Kira, Kyushu University, for initial IPND discussions; and Amy Clayton and Katrina Rivera for administrative assistance and Cory Poetzl and Bonnie Schimek for media support services (Mayo Clinic, Scottsdale, AZ).

## STUDY FUNDING

The International Panel for Neuromyelitis Optica Diagnosis was supported by the Guthy Jackson Charitable Foundation.

## DISCLOSURE

D. Wingerchuk has received research support from Alexion, TerumoBCT, and the Guthy Jackson Charitable Foundation, receives financial compensation for participation on a relapse adjudication panel for MedImmune, has served as a consultant to Alexion, MedImmune, and Chugai Pharmaceuticals, and has served as co-Editor-in-Chief of *The Neurologist*. B. Banwell serves as an advisor on clinical trial design for Biogen Idec, Sanofi, Teva Neurosci-

ence, and Novartis. Dr. Banwell provides consultant services for Novartis. Dr. Banwell is an Editor-in-Chief for *Multiple Sclerosis and Related Disorders*. J. Bennett serves as a consultant for Novartis Pharmaceuticals, Alnaylam Pharmaceuticals, MedImmune, Chugai Pharmaceuticals, EMD Serono, Abbott Pharmaceuticals, Genentech, Genzyme, and Questcor Pharmaceuticals; receives license royalties for a patent re: Compositions and Methods for the Treatment of Neuromyelitis Optica; and serves on the editorial boards of the *Multiple Sclerosis Journal* and *Journal of Neuroophthalmology*. P. Cabre reports no disclosures relevant to the manuscript. W. Carroll has received travel assistance and/or honoraria from, and provided advice to, Bayer Schering Pharma, Biogen Idec, Novartis, Genzyme, Sanofi-Aventis, CSL, and Merck-Serono. T. Chitnis has performed consulting for Biogen Idec and Novartis. Has received support for research activities from Novartis and Merck-Serono. J. de Seze has performed consulting for Alexion, Chugai, and Novartis. K. Fujihara serves on scientific advisory boards for Bayer Schering Pharma, Biogen Idec, Mitsubishi Tanabe Pharma Corporation, Novartis Pharma, Chugai Pharmaceutical, Ono Pharmaceutical, Nihon Pharmaceutical, Merck Serono, Alexion Pharmaceuticals, Medimmune, and Medical Review; has received funding for travel and speaker honoraria from Bayer Schering Pharma, Biogen Idec, Eisai Inc., Mitsubishi Tanabe Pharma Corporation, Novartis Pharma, Astellas Pharma Inc., Takeda Pharmaceutical Company Limited, Asahi Kasei Medical Co., Daiichi Sankyo, and Nihon Pharmaceutical; serves as an editorial board member of *Clinical and Experimental Neuroimmunology* (2009–present) and an advisory board member of *Sri Lanka Journal of Neurology*; has received research support from Bayer Schering Pharma, Biogen Idec Japan, Asahi Kasei Medical, The Chemo-Sero-Therapeutic Research Institute, Teva Pharmaceutical, Mitsubishi Tanabe Pharma, Teijin Pharma, Chugai Pharmaceutical, Ono Pharmaceutical, Nihon Pharmaceutical, and Genzyme Japan; and is funded as the secondary investigator (22229008, 2010–2015) by the Grants-in-Aid for Scientific Research from the Ministry of Education, Science and Technology of Japan and as the secondary investigator by the Grants-in-Aid for Scientific Research from the Ministry of Health, Welfare and Labor of Japan (2010–present). B. Greenberg has received compensation for consulting services from Chugai, GSK, Biogen, Novartis, DioGenix, and Amplimmune and receives research support from the Guthy Jackson Charitable Foundation. A. Jacob has received honoraria for clinical trial advisory boards and speaker's fees from Chugai, Alexion, and Biogen. S. Jarius has been supported by a research grant from the European Committee for Treatment and Research in Multiple Sclerosis (ECTRIMS); S. Jarius' department has been supported by research grants from Merck Serono and from the Dietmar Hopp Foundation and by a travel grant from the Guthy-Jackson Charitable Foundation. M. Lana-Peixoto has served on a scientific advisory board for Novartis. M. Levy is supported by research funds from the NIH, Guthy Jackson Charitable Foundation, Viropharma, Acorda, ApoPharma, and Sanofi. He has received advisory compensation from GlaxoSmithKline and Asterias. J. Simon has served as a consultant and received research support from Biogen Idec. S. Tenenbaum has received honoraria for speaking from Biogen Idec and Merck Serono and for participation in an advisory group for Biogen Idec, Merck Serono, and Teva Pharmaceutical Ind. A. Traboulsee has received grant funding from the MS Society of Canada, the Canadian Institute for Health Research, the Lotte and John Hecht Foundation, the Vancouver Hospital Foundation, Bayer, Roche, and Biogen. He has served on the data safety monitoring board for Merck Serono and a clinical trial steering committee for Roche. He has received honoraria or travel grants from Biogen, Teva Canada Innovation, Roche, Merck/EMD Serono, and Chugai Pharmaceuticals. P. Waters is a named inventor on patents for antibody assays (no. 20120114666, application no. 1310855.0) and has received royalties. He has received a speaker honorarium from Biogen Idec and Euroimmun AG. K. Wellik reports no dis-

closures relevant to the manuscript. B. Weinschenker has received a research grant from the Guthy Jackson Foundation. He receives royalties from RSR, Ltd. for a technology license related to a test for aquaporin-4 autoantibodies for diagnosis of neuromyelitis optica. He receives financial compensation for service on data safety monitoring committees for Novartis, Biogen Idec, and Mitsubishi pharmaceutical companies for MS clinical trials, and on a relapse adjudication panel for MedImmune Pharmaceuticals for NMO clinical trials. He served as a consultant for GlaxoSmithKline, Elan, Ono, Chugai, Chord, and Alexion pharmaceutical companies and for Asahi Kasei Medical Company, all for activities related to design of clinical trials for neuromyelitis optica. He serves on editorial boards for *Neurology*<sup>®</sup>, the *Canadian Journal of Neurological Sciences*, and the *Turkish Journal of Neurology*. Go to Neurology.org for full disclosures.

Received September 30, 2014. Accepted in final form January 28, 2015.

## REFERENCES

1. Wingerchuk DM, Lennon VA, Lucchinetti CF, Pittock SJ, Weinschenker BG. The spectrum of neuromyelitis optica. *Lancet Neurol* 2007;6:805–815.
2. Wingerchuk DM, Lennon VA, Pittock SJ, Lucchinetti CF, Weinschenker BG. Revised diagnostic criteria for neuromyelitis optica. *Neurology* 2006;66:1485–1489.
3. Jarius S, Wildemann B. The history of neuromyelitis optica. *J Neuroinflammation* 2013;10:8.
4. Wingerchuk DM, Hogancamp WF, O'Brien PC, Weinschenker BG. The clinical course of neuromyelitis optica (Devic's syndrome). *Neurology* 1999;53:1107–1114.
5. Lennon VA, Wingerchuk DM, Kryzer TJ, et al. A serum autoantibody marker of neuromyelitis optica: distinction from multiple sclerosis. *Lancet* 2004;364:2106–2112.
6. Lennon VA, Kryzer TJ, Pittock SJ, Verkman AS, Hinson SR. IgG marker of optic-spinal multiple sclerosis binds to the aquaporin-4 water channel. *J Exp Med* 2005;202:473–477.
7. Papadopoulos MC, Verkman AS. Aquaporin 4 and neuromyelitis optica. *Lancet Neurol* 2012;11:535–544.
8. Asgari N, Lillevang ST, Skejoe HP, Falah M, Stenager E, Kyvik KO. A population-based study of neuromyelitis optica in Caucasians. *Neurology* 2011;76:1589–1595.
9. Cabre P. Migration and multiple sclerosis: the French West Indies experience. *J Neurol Sci* 2007;262:117–121.
10. Cabrera-Gomez JA, Kurtzke JF, Gonzalez-Quevedo A, Lara-Rodríguez R. An epidemiological study of neuromyelitis optica in Cuba. *J Neurol* 2009;256:35–44.
11. Kuroiwa Y, Shibasaki H. Epidemiologic and clinical studies of multiple sclerosis in Japan. *Neurology* 1976;26:8–10.
12. Jarius S, Wildemann B. Aquaporin-4 antibodies (NMOIgG) as a serological marker of neuromyelitis optica: a critical review of the literature. *Brain Pathol* 2013;23:661–683.
13. Waters PJ, McKeon A, Leite MI, et al. Serologic diagnosis of NMO: a multicenter comparison of aquaporin-4-IgG assays. *Neurology* 2012;78:665–671.
14. Sato DK, Nakashima I, Takahashi T, et al. Aquaporin-4 antibody-positive cases beyond current diagnostic criteria for NMO spectrum disorders. *Neurology* 2013;80:2210–2216.
15. Kimbrough DJ, Fujihara K, Jacob A, et al. Treatment of neuromyelitis optica: review and recommendations. *Mult Scler Relat Disord* 2012;1:180–187.
16. Kleiter I, Hellwig K, Berthele A, et al. Failure of natalizumab to prevent relapses in neuromyelitis optica. *Arch Neurol* 2012;69:239–245.
17. Min JH, Kim BJ, Lee KH. Development of extensive brain lesions following fingolimod (FTY720) treatment in a patient with neuromyelitis optica spectrum disorder. *Mult Scler* 2012;18:113–115.

18. Papeix C, Vidal JS, de Seze J, et al. Immunosuppressive therapy is more effective than interferon in neuromyelitis optica. *Mult Scler* 2007;13:256–259.
19. Matiello M, Lennon VA, Jacob A, et al. NMO-IgG predicts the outcome of recurrent optic neuritis. *Neurology* 2008;70:2197–2200.
20. Weinshenker BG, Wingerchuk DM, Vukusic S, et al. Neuromyelitis optica IgG predicts relapse after longitudinally extensive transverse myelitis. *Ann Neurol* 2006;59:566–569.
21. Nagaishi A, Takagi M, Umemura A, et al. Clinical features of neuromyelitis optica in a large Japanese cohort: comparison between phenotypes. *J Neurol Neurosurg Psychiatry* 2011;82:1360–1364.
22. Misu T, Fujihara K, Nakashima I, Sato S, Itoyama Y. Intractable hiccup and nausea with periaqueductal lesions in neuromyelitis optica. *Neurology* 2005;65:1479–1482.
23. Apiwattanakul M, Popescu BF, Matiello M, et al. Intractable vomiting as the initial presentation of neuromyelitis optica. *Ann Neurol* 2010;68:757–761.
24. Kremer L, Mealy M, Jacob A, et al. Brainstem manifestations in neuromyelitis optica: a multicenter study of 258 patients. *Mult Scler* 2014;20:843–847.
25. Poppe AY, Lapierre Y, Melancon D, et al. Neuromyelitis optica with hypothalamic involvement. *Mult Scler* 2005;11:617–621.
26. Vernant JC, Cabre P, Smadja D, et al. Recurrent optic neuromyelitis with endocrinopathies: a new syndrome. *Neurology* 1997;48:58–64.
27. Kim W, Kim SH, Lee SH, Li XF, Kim HJ. Brain abnormalities as an initial manifestation of neuromyelitis optica spectrum disorder. *Mult Scler* 2011;17:1107–1112.
28. Magana SM, Matiello M, Pittock SJ, et al. Posterior reversible encephalopathy syndrome in neuromyelitis optica spectrum disorders. *Neurology* 2009;72:712–717.
29. Kim SM, Go MJ, Sung JJ, Park KS, Lee KW. Painful tonic spasm in neuromyelitis optica: incidence, diagnostic utility, and clinical characteristics. *Arch Neurol* 2012;69:1026–1031.
30. Popescu BF, Lennon VA, Parisi JE, et al. Neuromyelitis optica unique area postrema lesions: nausea, vomiting, and pathogenic implications. *Neurology* 2011;76:1229–1237.
31. Wingerchuk DM, Pittock SJ, Lucchinetti CF, Lennon VA, Weinshenker BG. A secondary progressive clinical course is uncommon in neuromyelitis optica. *Neurology* 2007;68:603–605.
32. Flanagan EP, Weinshenker BG, Krecke KN, et al. Short myelitis lesions in aquaporin-4-IgG-positive neuromyelitis optica spectrum disorders. *JAMA Neurol* 2015;72:81–87.
33. Kim W, Park MS, Lee SH, et al. Characteristic brain magnetic resonance imaging abnormalities in central nervous system aquaporin-4 autoimmunity. *Mult Scler* 2010;16:1229–1236.
34. Huh SY, Min JH, Kim W, et al. The usefulness of brain MRI at onset in the differentiation of multiple sclerosis and seropositive neuromyelitis optica spectrum disorders. *Mult Scler* 2014;20:695–704.
35. Bourre B, Zephir H, Ongagna JC, et al. Long-term followup of acute partial transverse myelitis. *Arch Neurol* 2012;69:357–362.
36. Scott TF, Kassab SL, Pittock SJ. Neuromyelitis optica IgG status in acute partial transverse myelitis. *Arch Neurol* 2006;63:1398–1400.
37. Jarius S, Ruprecht K, Wildemann B, et al. Contrasting disease patterns in seropositive and seronegative neuromyelitis optica: a multicentre study of 175 patients. *J Neuroinflammation* 2012;9:14.
38. Matthews L, Marasco R, Jenkinson M, et al. Distinction of seropositive NMO spectrum disorder and MS brain lesion distribution. *Neurology* 2013;80:1330–1337.
39. Pittock SJ, Lennon VA, Krecke K, Wingerchuk DM, Lucchinetti CF, Weinshenker BG. Brain abnormalities in neuromyelitis optica. *Arch Neurol* 2006;63:390–396.
40. Pittock SJ, Weinshenker BG, Lucchinetti CF, Wingerchuk DM, Corboy JR, Lennon VA. Neuromyelitis optica brain lesions localized at sites of high aquaporin 4 expression. *Arch Neurol* 2006;63:964–968.
41. Nakamura M, Misu T, Fujihara K, et al. Occurrence of acute large and edematous callosal lesions in neuromyelitis optica. *Mult Scler* 2009;15:695–700.
42. Magana SM, Pittock SJ, Lennon VA, Keegan BM, Weinshenker BG, Lucchinetti CF. Neuromyelitis optica IgG serostatus in fulminant central nervous system inflammatory demyelinating disease. *Arch Neurol* 2009; 66:964–966.
43. Kim JE, Kim SM, Ahn SW, et al. Brain abnormalities in neuromyelitis optica. *J Neurol Sci* 2011;302:43–48.
44. Waters P, Pittock SJ, Bennett JL, Jarius S, Weinshenker BG, Wingerchuk DM. Evaluation of aquaporin-4 antibody assays. *Clin Exp Neuroimmunol* 2014;5:290–303.
45. Pittock SJ, Lennon VA, Bakshi N, et al. Seroprevalence of aquaporin-4-IgG in a northern California population representative cohort of multiple sclerosis. *JAMA Neurol* 2014;71:1433–1436.
46. Marignier R, Bernard-Valnet R, Giraudon P, et al. Aquaporin-4 antibody-negative neuromyelitis optica: distinct assay sensitivity-dependent entity. *Neurology* 2013;80:2194–2200.
47. Kitley J, Woodhall M, Waters P, et al. Myelin-oligodendrocyte glycoprotein antibodies in adults with a neuromyelitis optica phenotype. *Neurology* 2012;79:1273–1277.
48. Kitley J, Waters P, Woodhall M, et al. Neuromyelitis optica spectrum disorders with aquaporin-4 and myelinoligodendrocyte glycoprotein antibodies: a comparative study. *JAMA Neurol* 2014;71:276–283.
49. Sato DK, Callegaro D, Lana-Peixoto MA, et al. Distinction between MOG antibody-positive and AQP4 antibody-positive NMO spectrum disorders. *Neurology* 2014;82:474–481.
50. Jarius S, Aboul-Enein F, Waters P, et al. Antibody to aquaporin-4 in the long-term course of neuromyelitis optica. *Brain* 2008;131:3072–3080.
51. Jiao Y, Fryer JP, Lennon VA, et al. Updated estimate of AQP4-IgG serostatus and disability outcome in neuromyelitis optica. *Neurology* 2013;81:1197–1204.
52. McKeon A, Pittock SJ, Lennon VA. CSF complements serum for evaluating paraneoplastic antibodies and NMO-IgG. *Neurology* 2011;76:1108–1110.
53. Jarius S, Paul F, Franciotta D, et al. Cerebrospinal fluid findings in aquaporin-4 antibody positive neuromyelitis optica: results from 211 lumbar punctures. *J Neurol Sci* 2011;306:82–90.
54. Collongues N, Marignier R, Zephir H, et al. Long-term follow-up of neuromyelitis optica with a pediatric onset. *Neurology* 2010;75:1084–1088.
55. Banwell B, Tenenbaum S, Lennon VA, et al. Neuromyelitis optica-IgG in childhood inflammatory demyelinating CNS disorders. *Neurology* 2008;70:344–352.
56. McKeon A, Lennon VA, Lotze T, et al. CNS aquaporin-4 autoimmunity in children. *Neurology* 2008;71:93–100.
57. Krupp LB, Tardieu M, Amato MP, et al. International Pediatric Multiple Sclerosis Study Group criteria for pediatric multiple sclerosis and immune-mediated central nervous system demyelinating disorders: revisions to the 2007 definitions. *Mult Scler* 2013;19:1261–1267.
58. Wingerchuk DM, Weinshenker BG. The emerging relationship between neuromyelitis optica and systemic rheumatologic autoimmune disease. *Mult Scler* 2012;18:5–10.
59. Lucchinetti CF, Guo Y, Popescu BF, Fujihara K, Itoyama Y, Misu T. The pathology of an autoimmune astrocytopathy: lessons learned from neuromyelitis optica. *Brain Pathol* 2014;24:83–97.
60. Popescu BFG, Guo Y, Jentoft ME, et al. Diagnostic utility of aquaporin-4 in the analysis of active demyelinating lesions. *Neurology* 2015;84:148–158.
